# Supplementary material for: Synthesis, Biological Evaluation and Molecular Modelling of 2′-Hydroxychalcones as Acetylcholinesterase Inhibitors
Source: Molecules. 2016 Jul 22;21(7):955. doi: 10.3390/molecules21070955 (PMC6273369; doi:10.3390/molecules21070955)
Supplement: Supplementary file 1 [file molecules-21-00955-s001.pdf]

# Supplementary Materials: Synthesis, Biological Evaluation and Molecular Modelling of 2'-Hydroxychalcones as Acetylcholinesterase Inhibitors

Sri Devi Sukumaran, Chin Fei Chee, Geetha Viswanathan, Michael J. C. Buckle, Rozana Othman, Noorsaadah Abd. Rahman and Lip Yong Chung

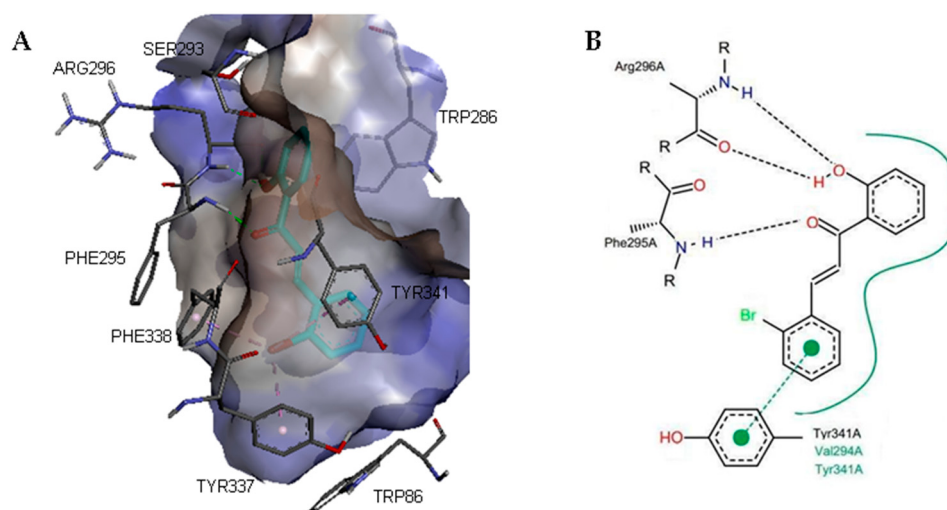

**Figure S1.** Representations of compound 7 in complex with human AChE (PDB ID: 4EY7). (A) 3D representation of the binding pose. The hydrophobic surfaces of the interacting residues are shown in blue relief. Hydrogen bonds and  $\pi$ -halogen interactions are depicted with green and purple dotted lines, respectively; (B) Schematic representation of the binding interactions. Hydrogen bonds and  $\pi$ - $\pi$  stacking interactions are depicted with black and green dotted lines, respectively. The green curve represents other non-polar interactions.

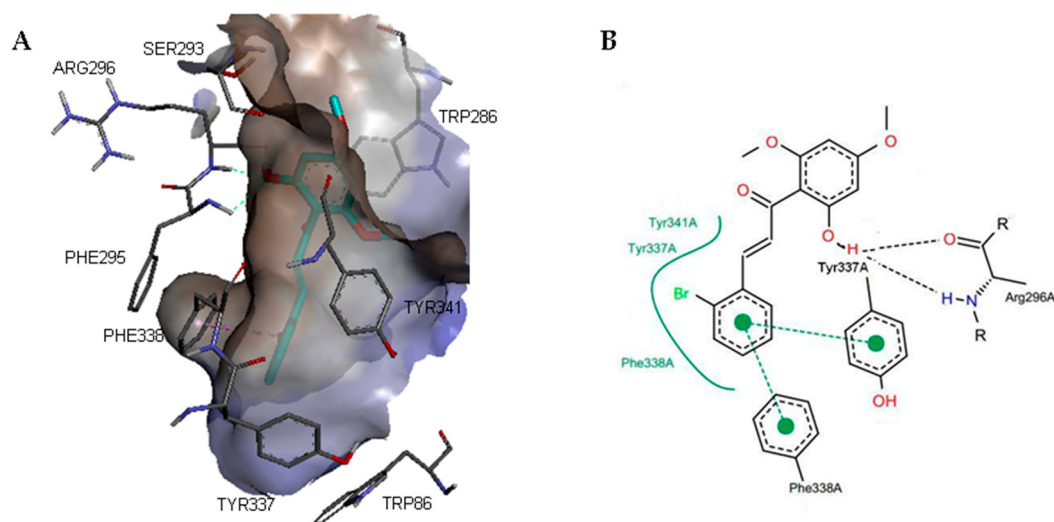

**Figure S2.** Representations of compound 13 in complex with human AChE (PDB ID: 4EY7). (A) 3D representation of the binding pose. The hydrophobic surfaces of the interacting residues are shown in blue relief. Hydrogen bonds and  $\pi$ -halogen interactions are depicted with green and purple dotted lines, respectively; (B) Schematic representation of the binding interactions. Hydrogen bonds and  $\pi$ - $\pi$  stacking interactions are depicted with black and green dotted lines, respectively. The green curve represents other non-polar interactions.

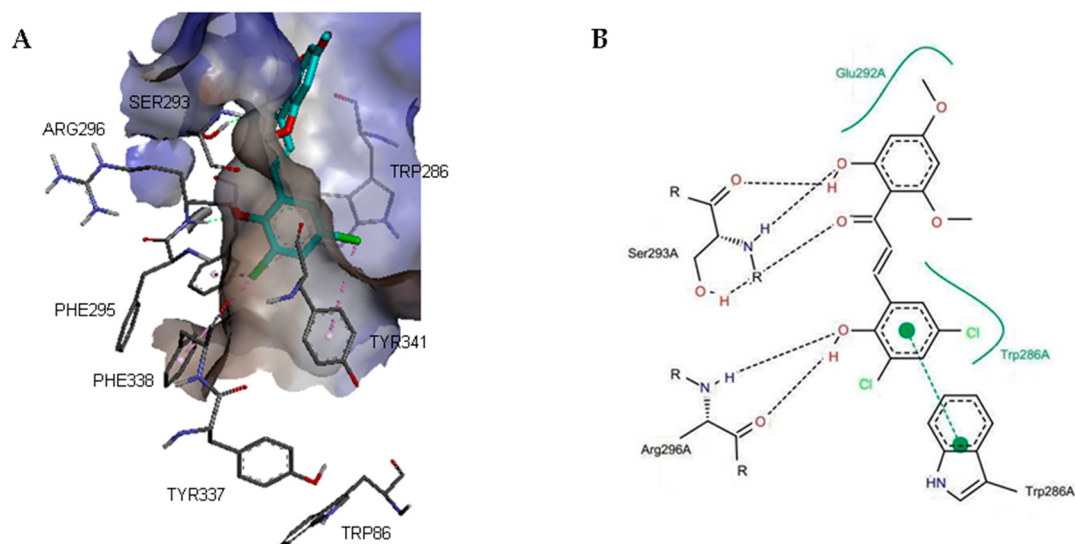

**Figure S3.** Representations of compound **14** in complex with human AChE (PDB ID: 4EY7). **(A)** 3D representation of the binding pose. The hydrophobic surfaces of the interacting residues are shown in blue relief. Hydrogen bonds and  $\pi$ -halogen interactions are depicted with green and purple dotted lines, respectively; **(B)** Schematic representation of the binding interactions. Hydrogen bonds and  $\pi$ - $\pi$  stacking interactions are depicted with black and green dotted lines, respectively. The green curve represents other non-polar interactions.

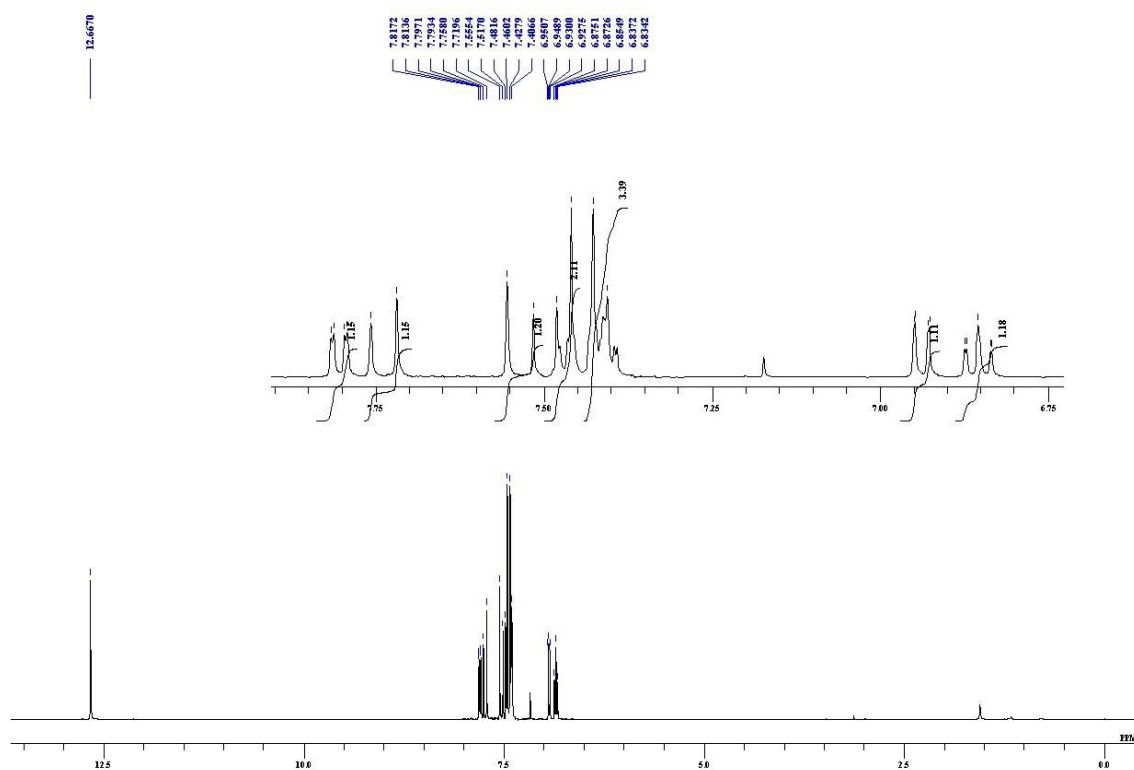

**Figure S4.** Cont.

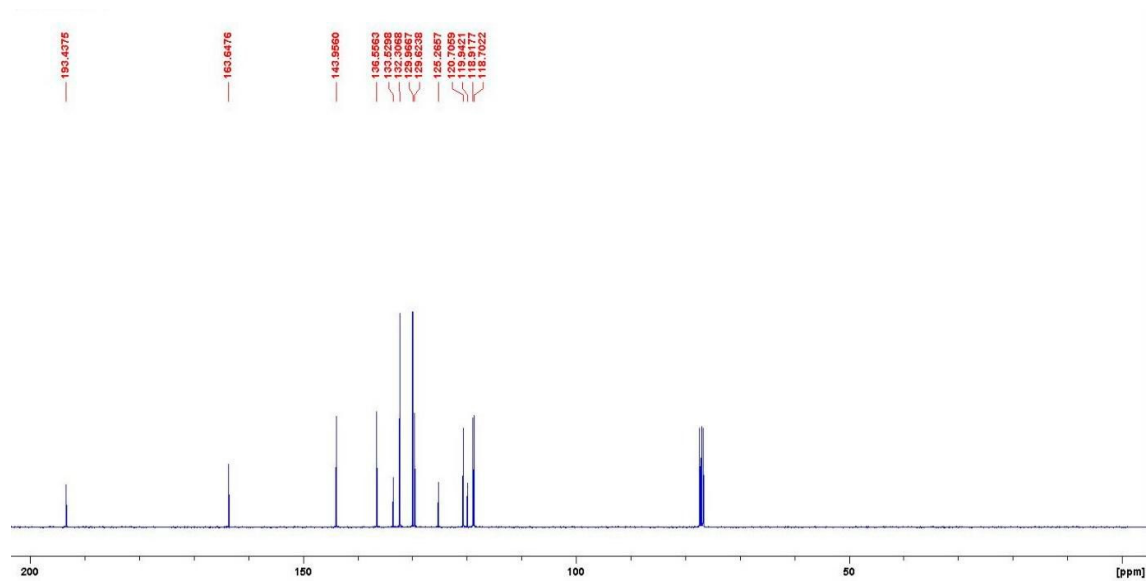Figure S4. <sup>1</sup>H-NMR and <sup>13</sup>C-NMR spectra of 4-Bromo-2'-hydroxychalcone (3).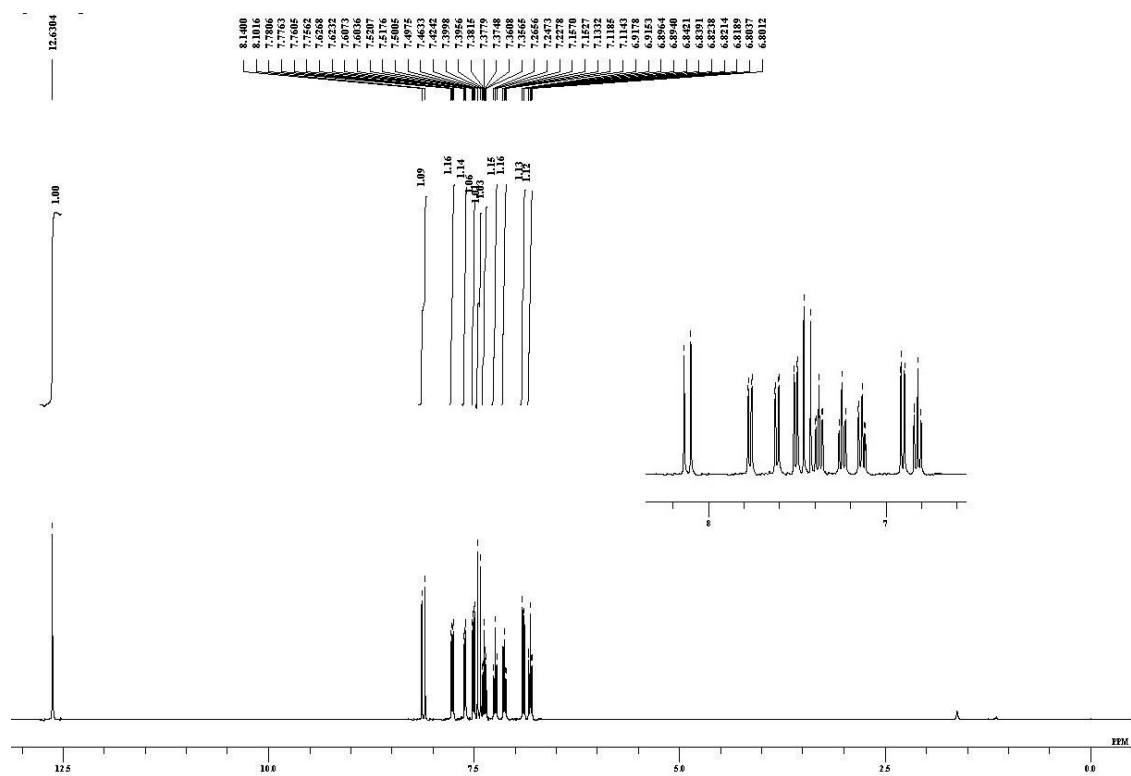

Figure S5. Cont.

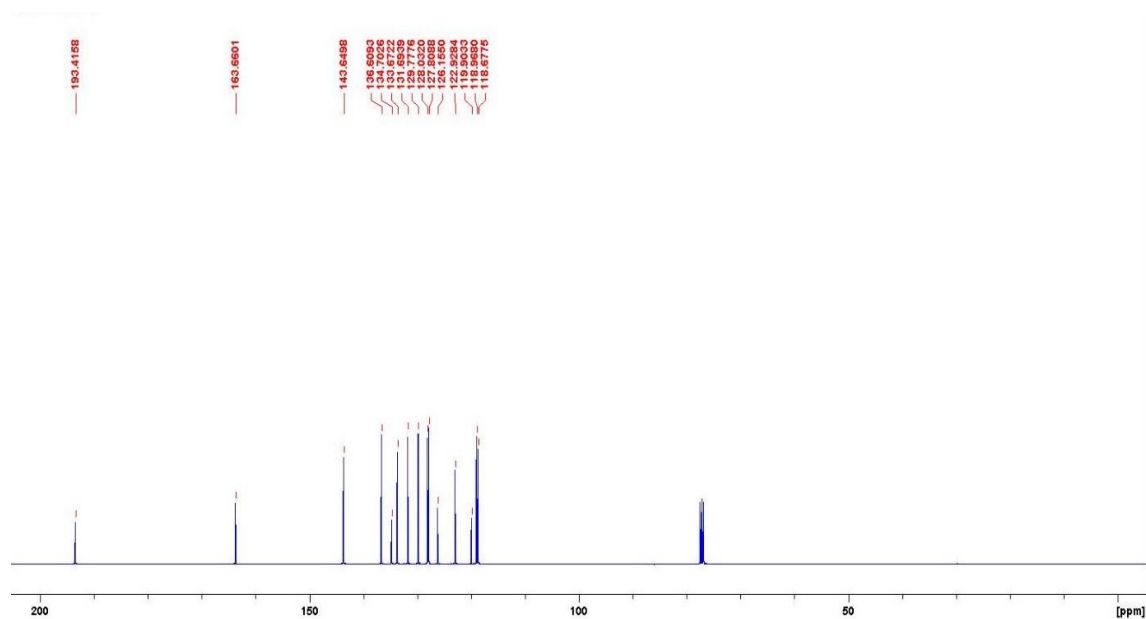Figure S5. <sup>1</sup>H-NMR and <sup>13</sup>C-NMR spectra of 2-Bromo-2'-hydroxychalcone (7).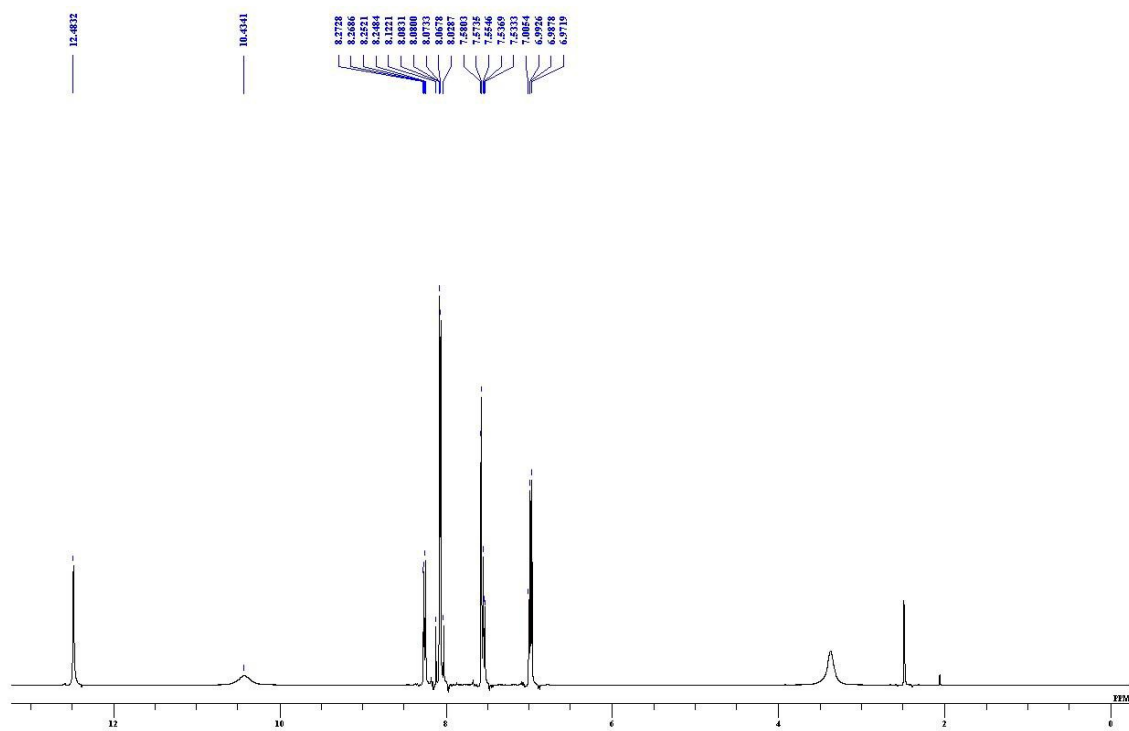

Figure S6. Cont.

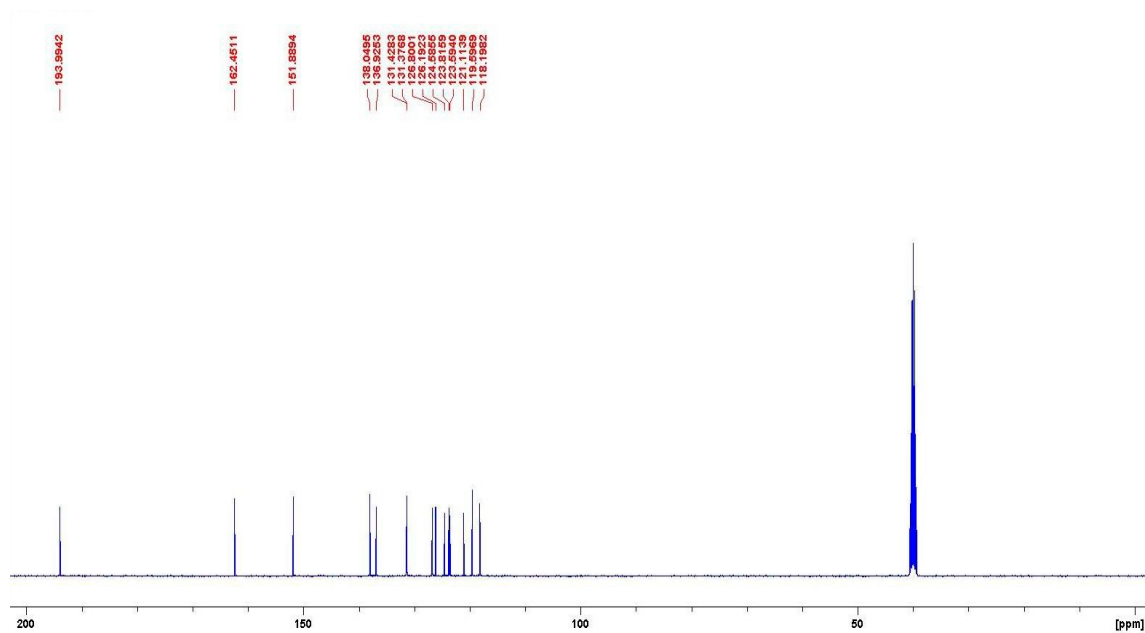

Figure S6. <sup>1</sup>H-NMR and <sup>13</sup>C-NMR spectra of 3,5-Dichloro-2,2'-dihydroxychalcone (8).

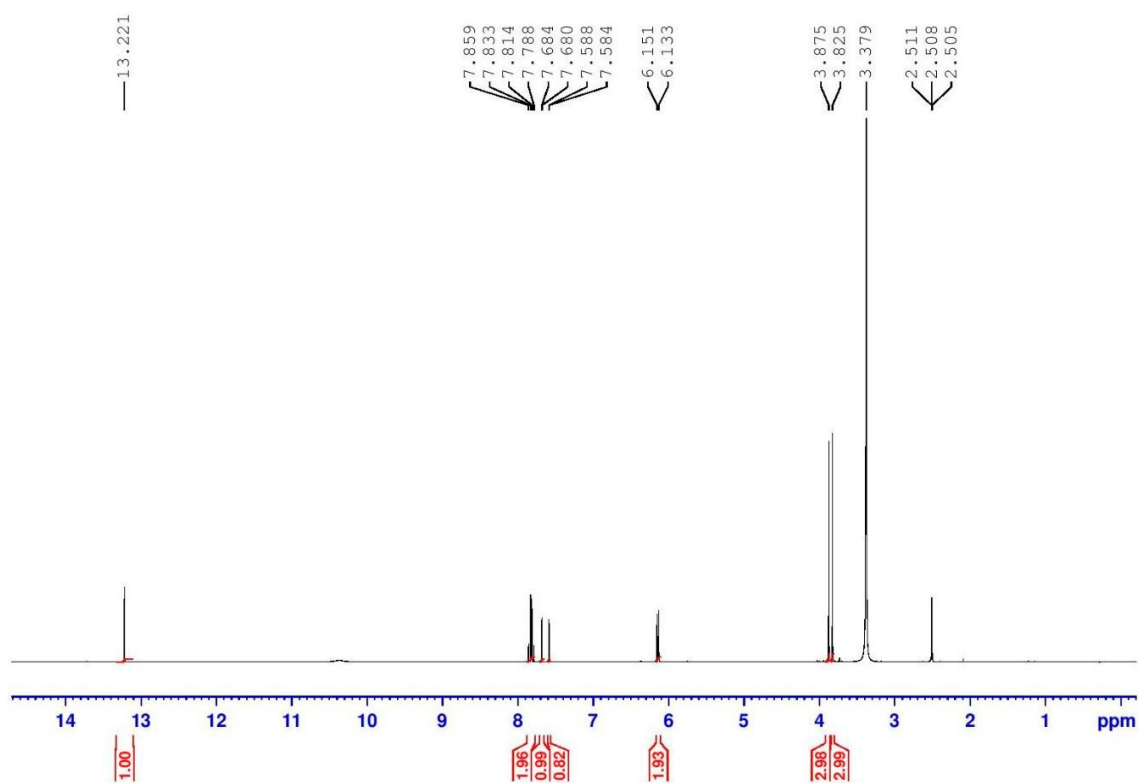

Figure S7. Cont.

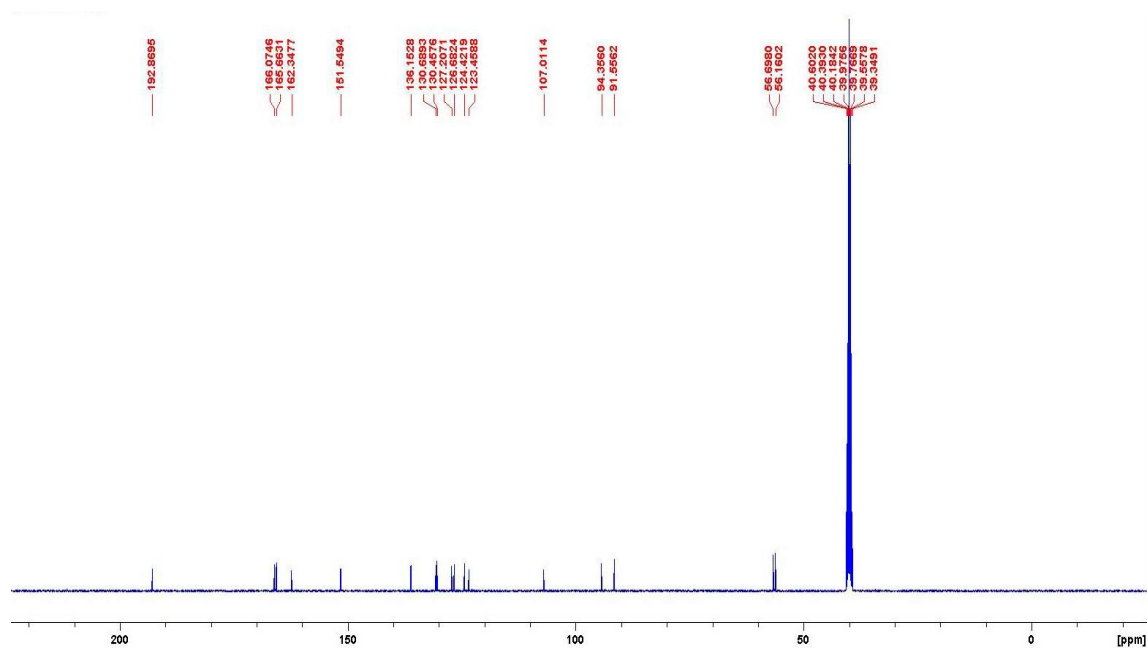

**Figure S7.** <sup>1</sup>H-NMR and <sup>13</sup>C-NMR spectra of 3,5-Dichloro-2,2'-dihydroxy-4',6'-dimethoxychalcone (**14**).
